# Supplementary material for: Characteristics of women obtaining induced abortions in selected low- and middle-income countries
Source: PLOS journal article supplement (doi:10.1371/journal.pone.0172976), 2017-03-29
Supplement: S1 (10.1371/journal.pone.0172976.s001) [file journal.pone.0172976.s001]

S1 Table. List of sources of data.

| Region/Country                           | Coverage                                                                                                                                                 | Data                | Year      | Data Source                                                                                                                                                                          |
|------------------------------------------|----------------------------------------------------------------------------------------------------------------------------------------------------------|---------------------|-----------|--------------------------------------------------------------------------------------------------------------------------------------------------------------------------------------|
| <i>Africa</i>                            |                                                                                                                                                          |                     |           |                                                                                                                                                                                      |
| Congo Republic                           | Nationally representative                                                                                                                                | Population-based    | 2011-12   | Demographic and Health Survey                                                                                                                                                        |
| Ethiopia                                 | Nationally representative of abortions obtained in public and private sector health facilities. Abortions in NGO affiliated facilities are not included. | Abortion patient    | 2014      | Prospective Data Survey                                                                                                                                                              |
| Gabon                                    | Nationally representative                                                                                                                                | Population-based    | 2012      | Demographic and Health Survey                                                                                                                                                        |
| Ghana                                    | Nationally representative                                                                                                                                | Population-based    | 2007      | Maternal Health Survey                                                                                                                                                               |
| Nigeria                                  | Eight states (covering all four health zones)                                                                                                            | Population-based    | 2002-03   | Community-based Survey                                                                                                                                                               |
| <i>Asia</i>                              |                                                                                                                                                          |                     |           |                                                                                                                                                                                      |
| Armenia                                  | Nationally representative                                                                                                                                | Population-based    | 2010      | Demographic and Health Survey                                                                                                                                                        |
| Azerbaijan                               | Nationally representative                                                                                                                                | Population-based    | 2006      | Demographic and Health Survey                                                                                                                                                        |
| Bangladesh                               | Nationally representative                                                                                                                                | Population-based    | 2011      | Demographic and Health Survey                                                                                                                                                        |
| Cambodia                                 | Nationally representative                                                                                                                                | Population-based    | 2010      | Demographic and Health Survey                                                                                                                                                        |
| Georgia                                  | Nationally representative                                                                                                                                | Official Statistics | 2011      | UN Demographic Yearbook                                                                                                                                                              |
| Kyrgyz Republic                          | Nationally representative                                                                                                                                | Population-based    | 2012      | Demographic and Health Survey                                                                                                                                                        |
| Nepal                                    | Nationally representative                                                                                                                                | Population-based    | 2011      | Demographic and Health Survey                                                                                                                                                        |
| Pakistan                                 | Nationally representative                                                                                                                                | Population-based    | 2012-13   | Demographic and Health Survey                                                                                                                                                        |
| Philippines                              | Nationally representative                                                                                                                                | Population-based    | 2004      | Community-based Survey                                                                                                                                                               |
| Tajikistan                               | Nationally representative                                                                                                                                | Population-based    | 2012      | Demographic and Health Survey                                                                                                                                                        |
| Turkey                                   | Nationally representative                                                                                                                                | Population-based    | 2008      | Demographic and Health Survey                                                                                                                                                        |
| Uzbekistan                               | Nationally representative                                                                                                                                | Population-based    | 2002      | Health Examination Survey                                                                                                                                                            |
| Vietnam                                  | Nationally representative                                                                                                                                | Population-based    | 2002      | Demographic and Health Survey                                                                                                                                                        |
| <i>Europe</i>                            |                                                                                                                                                          |                     |           |                                                                                                                                                                                      |
| Albania                                  | Nationally representative                                                                                                                                | Population-based    | 2008-09   | Demographic and Health Survey                                                                                                                                                        |
| Belarus                                  | Nationally representative                                                                                                                                | Official Statistics | 2013      | UN Demographic Yearbook                                                                                                                                                              |
| Bulgaria                                 | Nationally representative                                                                                                                                | Official Statistics | 2013      | UN Demographic Yearbook                                                                                                                                                              |
| Moldova                                  | Nationally representative                                                                                                                                | Population-based    | 2005      | Demographic and Health Survey                                                                                                                                                        |
| Montenegro                               | Nationally representative                                                                                                                                | Official Statistics | 2005      | UN Demographic Yearbook                                                                                                                                                              |
| Romania                                  | Nationally representative                                                                                                                                | Official Statistics | 2012      | UN Demographic Yearbook                                                                                                                                                              |
| Serbia                                   | Nationally representative                                                                                                                                | Official Statistics | 2008      | UN Demographic Yearbook                                                                                                                                                              |
| Ukraine                                  | Nationally representative                                                                                                                                | Population-based    | 2007      | Demographic and Health Survey                                                                                                                                                        |
| <i>Central America and the Caribbean</i> |                                                                                                                                                          |                     |           |                                                                                                                                                                                      |
| Haiti                                    | Nationally representative                                                                                                                                | Population-based    | 2012      | Demographic and Health Survey                                                                                                                                                        |
| Mexico City (Mexico)                     | City (Mexico City). Representative of abortions obtained in public sector facilities. Abortions obtained in private sector facilities are not included.  | Abortion patient    | 2007-2010 | Mondragon y Kalb et al., Patient characteristics and service trends following abortion legalization in Mexico City, 2007-10. Studies in Family Planning, Vol. 42, No.3, pp. 159-166. |
